# Supplementary material for: Lithium cuprate, a multifunctional material for NO selective catalytic reduction by CO with subsequent carbon oxide capture at moderate temperatures
Source: Royal Society of Chemistry journal article supplement (doi:10.1039/d1re00319d), 2021-01-01
Supplement: d1re00319d1.pdf [file d1re00319d1.pdf]

## Supporting Information

### Lithium cuprate, a multifunctional material for NO selective catalytic reduction by CO, with subsequent carbon oxides capture at moderate temperatures

Ana Yañez-Aulestia,<sup>1</sup> Yuhua Duan<sup>2</sup>, Qiang Wang<sup>3</sup> and Heriberto Pfeiffer<sup>1,\*</sup>

<sup>1</sup>Instituto de Investigaciones en Materiales, Universidad Nacional Autónoma de México, Circuito exterior s/n,  
Cd. Universitaria, Del. Coyoacán C.P. 04510, Ciudad de México, Mexico.

<sup>2</sup>National Energy Technology Laboratory, United States Department of Energy, 626 Cochrans Mill Road,  
Pittsburgh, PA 15236, United States.

<sup>3</sup>College of Environmental Science and Engineering, Beijing Forestry University, Beijing 100083, P. R.  
China.

\*Corresponding author. Phone +52 (55) 5622 4627 and E-mail: pfeiffer@materiales.unam.mx

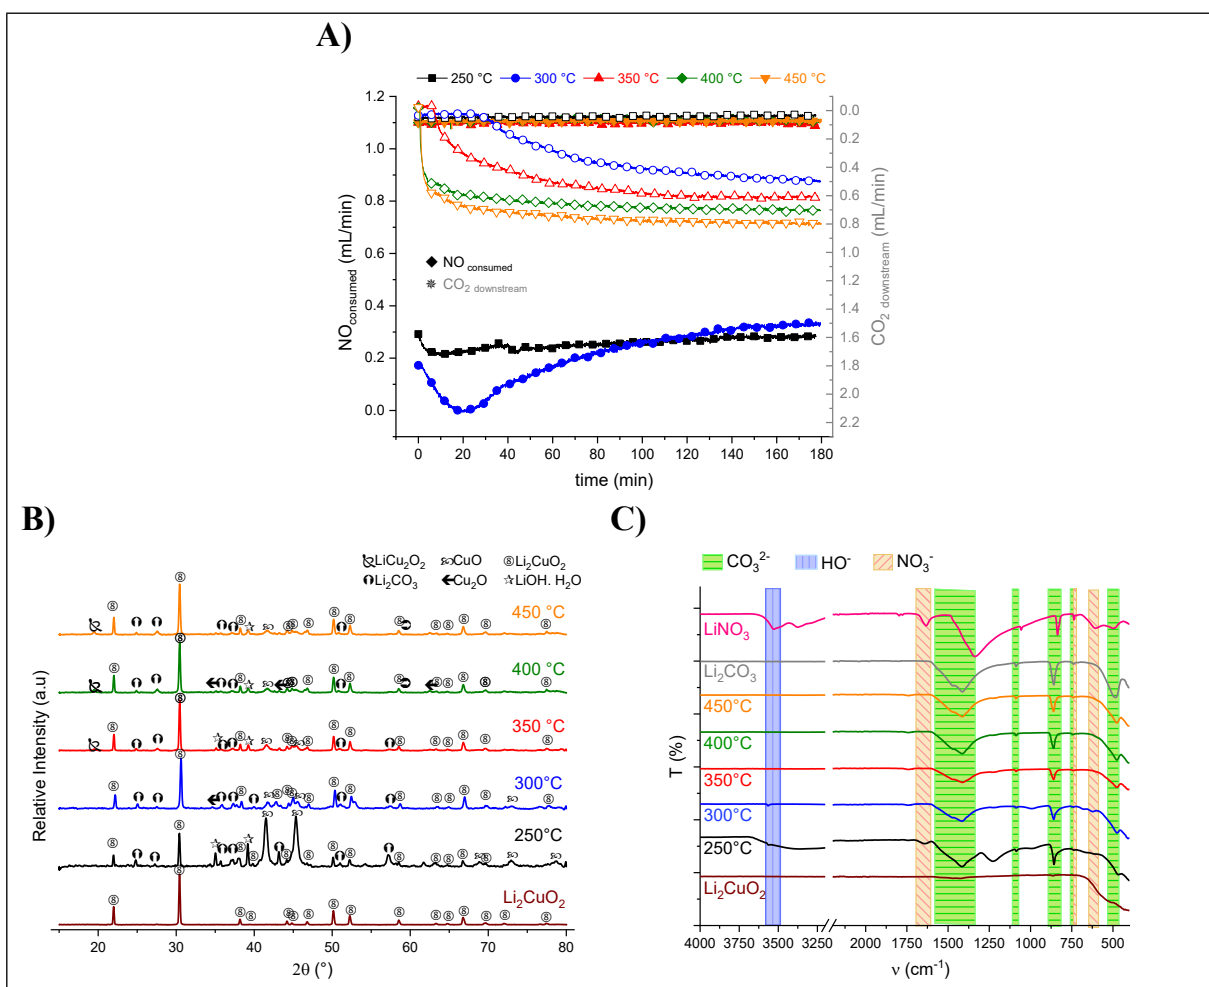

**Figure S1.** Evolution of NO consumption and CO<sub>2</sub> downstream obtained during the isothermal

processes for three hours (A), XRD patterns (B) and ATR-FTIR spectra (C) performed on  $\text{Li}_2\text{CuO}_2$  at different temperatures. The  $\text{NO}:\text{CO}$  ratio used for these isotherms was 1:2. The pristine  $\text{Li}_2\text{CuO}_2$  pattern,  $\text{Li}_2\text{CO}_3$  and  $\text{LiNO}_3$  spectra are included for comparison purposes.

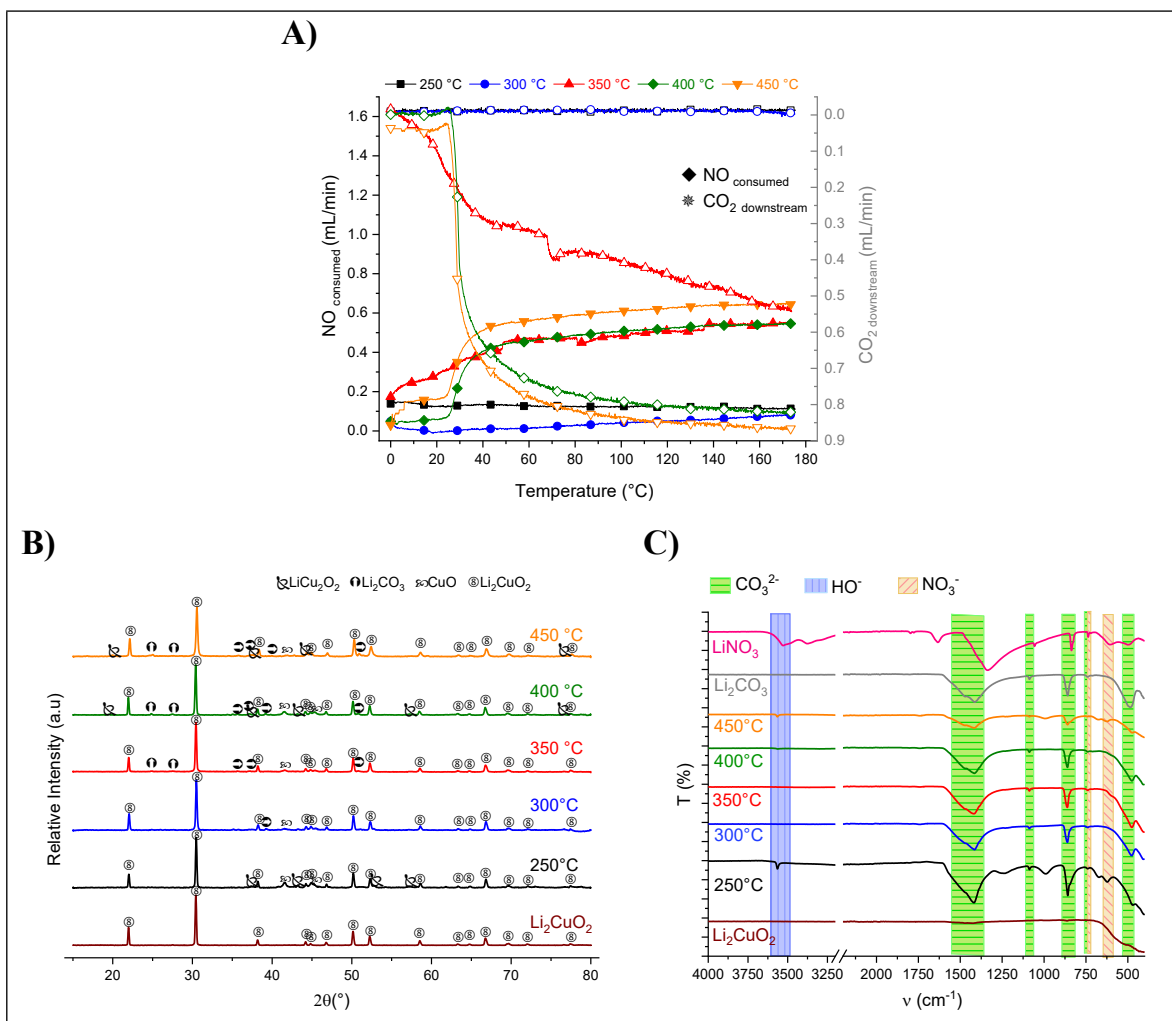

**Figure S2.** Evolution of NO consumption and  $\text{CO}_2$  downstream obtained during the isothermal processes for three hours (A), XRD patterns (B) and ATR-FTIR spectra (C) performed on  $\text{Li}_2\text{CuO}_2$  at different temperatures. The  $\text{NO}:\text{CO}$  ratio used for these isotherms was 2:1. The pristine  $\text{Li}_2\text{CuO}_2$ , pattern  $\text{Li}_2\text{CO}_3$  and  $\text{LiNO}_3$  spectra are included for comparison purposes.
